# Supplementary material for: Characterization of Influenza Hemagglutinin Interactions with Receptor by NMR
Source: PLOS journal article supplement (doi:10.1371/journal.pone.0033958), 2012-07-16

Figure S1: STD NMR spectrum of 3'SL and 6'SL in the absence of HA (the control experiment for the STD). The experimental conditions were 3 mM SA in PBS (pH 7.4) at 25°C. Note that these spectra were obtained on a Bruker 800 MHz spectrometer equipped with a room temperature triple resonance probe.

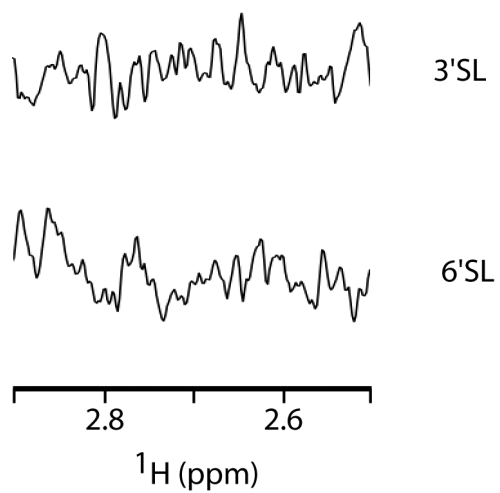

Supplement: S1 (10.1371/journal.pone.0033958.s001) [file journal.pone.0033958.s001]
