# Supplementary material for: Characterization of Influenza Hemagglutinin Interactions with Receptor by NMR
Source: PLOS journal article supplement (doi:10.1371/journal.pone.0033958), 2012-07-16

Figure S2: STD competition assay for H5-Q binding to 3'SL and 6'SL. The experimental conditions were 2  $\mu$ M HA, 3 mM 6'SL, 3 mM 3'SL (upper spectrum) or 6 mM 3'SL (lower spectrum) in PBS, pH 7.4 at 25°C.

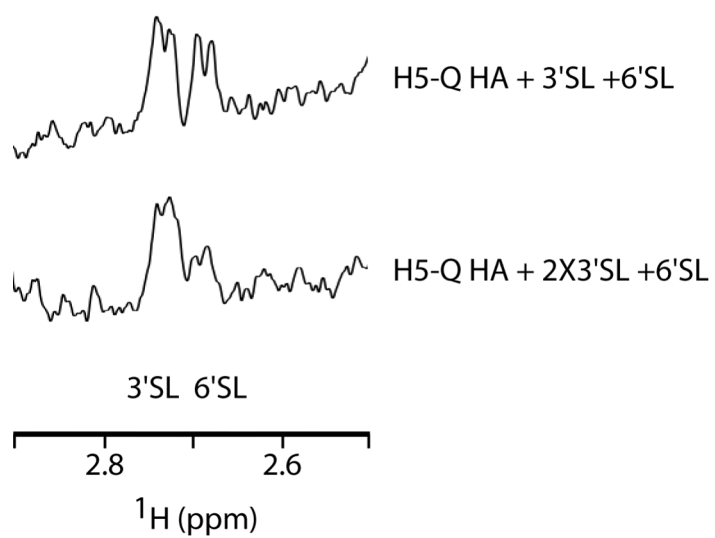

Supplement: S2 (10.1371/journal.pone.0033958.s002) [file journal.pone.0033958.s002]
