# Supplementary material for: Characterization of Influenza Hemagglutinin Interactions with Receptor by NMR
Source: PLOS journal article supplement (doi:10.1371/journal.pone.0033958), 2012-07-16

Figure S3: Structural alignment of influenza HA H1 (red) and H5-V (blue) backbones. The green residues correspond to residues that interact with SA.

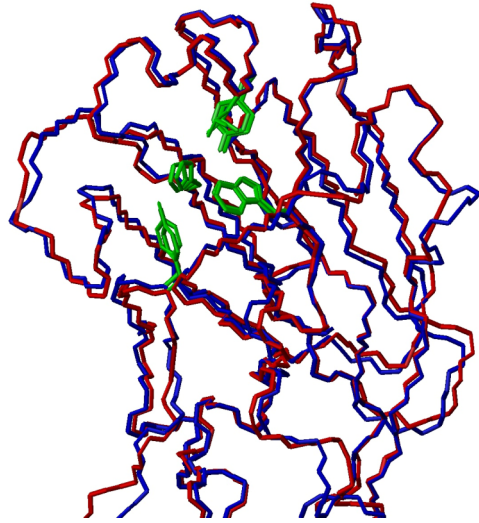

Supplement: S3 (10.1371/journal.pone.0033958.s003) [file journal.pone.0033958.s003]
